# Supplementary material
Source: Research Square preprint supplement (doi:10.21203/rs.3.rs-8985427/v1)
Supplement: Supplementary file 1 [file 16a762b8d17350fcd8154dcd.xlsx]

## Sheet: Feature Analysis
Sjogren Syndrome Patient Feature Analysis (ILD Subgroup)
Feature Name	Total (n=609)	SS-ILD (n=221)	SS-non-ILD (n=388)	P Value
Basic Features
Age (years)	61.0 (54.0, 70.0)	66.0 (58.0, 74.0)	59.0 (52.0, 67.0)	0.001
Female Gender	536 (88.01%)	200 (90.50%)	336 (86.60%)	0.195
Smoking History	17 (2.79%)	7 (3.17%)	10 (2.58%)	0.866
Drinking History	13 (2.13%)	4 (1.81%)	9 (2.32%)	0.899
Family History of Autoimmune Disease	2 (0.33%)	2 (0.90%)	0 (0.00%)	0.254
Allergy History	99 (16.26%)	45 (20.36%)	54 (13.92%)	0.05
2. Clinical Features
Disease Duration (years)	2.6 (0.7, 4.8)	2.3 (0.7, 4.6)	2.9 (0.7, 4.8)	0.141
Comorbidities
Hypertension	168 (27.59%)	92 (41.63%)	76 (19.59%)	0.001
Diabetes Mellitus	50 (8.21%)	26 (11.76%)	24 (6.19%)	0.024
Tuberculosis	13 (2.13%)	5 (2.26%)	8 (2.06%)	0.935
Coronary Heart Disease	40 (6.57%)	19 (8.60%)	21 (5.41%)	0.175
Treatment Medications
Hydroxychloroquine Use	114 (18.72%)	44 (19.91%)	70 (18.04%)	0.645
Glucocorticoids Use	60 (9.85%)	23 (10.41%)	37 (9.54%)	0.837
Methotrexate Use	25 (4.11%)	4 (1.81%)	21 (5.41%)	0.052
Iguratimod Use	37 (6.08%)	18 (8.14%)	19 (4.90%)	0.151
Chinese Herbal Medicine Treatment	287 (47.13%)	125 (56.56%)	162 (41.75%)	0.001
3. Laboratory Parameters
Inflammatory Markers
Increased ESR (Erythrocyte Sedimentation Rate)	281 (46.14%)	105 (47.51%)	176 (45.36%)	0.669
Increased CRP (C-reactive Protein)	262 (43.02%)	100 (45.25%)	162 (41.75%)	0.452
Decreased Complement C3	245 (40.23%)	88 (39.82%)	157 (40.46%)	0.944
Decreased Complement C4	245 (40.23%)	88 (39.82%)	157 (40.46%)	0.944
Immunoglobulins
Increased IgG	270 (44.33%)	98 (44.34%)	172 (44.33%)	0.946
Increased IgA	269 (44.17%)	98 (44.34%)	171 (44.07%)	0.946
Increased IgM	269 (44.17%)	98 (44.34%)	171 (44.07%)	0.946
Autoantibodies
ANA Positive	240 (39.41%)	84 (38.01%)	156 (40.21%)	0.655
Anti-SSA/Ro Antibody Positive	232 (38.10%)	81 (36.65%)	151 (38.92%)	0.641
Anti-SSB/La Antibody Positive	232 (38.10%)	81 (36.65%)	151 (38.92%)	0.641
RF Positive (Rheumatoid Factor)	241 (39.57%)	87 (39.37%)	154 (39.69%)	0.988
Anti-CCP Antibody Positive	215 (35.30%)	70 (31.67%)	145 (37.37%)	0.185
Novel Inflammatory Composite Indices
SII (Systemic Immune-Inflammation Index)	231.9 (77.6, 852.8)	173.4 (91.3, 362.4)	245.3 (69.0, 885.5)	0.691
PIV (Platelet-Neutrophil-Monocyte Index)	105.6 (28.1, 405.3)	105.6 (38.6, 155.8)	114.5 (25.3, 466.4)	0.802
