# Supplementary material
Source: Research Square preprint supplement (doi:10.21203/rs.3.rs-8985427/v1)
Supplement: Supplementary file 2 [file 83e02cbc9272075671eed834.xlsx]

## Sheet: Sheet1
Model	AUC_mean	AUC_std	AUC_95%CI_lower	AUC_95%CI_upper	Accuracy_mean	Accuracy_std	F1_mean	F1_std
Logistic Regression	0.6827	0.0442	0.6439	0.7215	0.6733	0.0154	0.3809	0.1188
ElasticNet	0.6727	0.0417	0.6361	0.7093	0.6469	0.0297	0.3941	0.1976
Random Forest	0.7438	0.0383	0.7102	0.7774	0.7028	0.0241	0.4886	0.1490
XGBoost	0.7507	0.0292	0.7251	0.7763	0.7110	0.0426	0.5332	0.0994
SVM	0.6578	0.0365	0.6258	0.6899	0.6273	0.0314	0.3573	0.1828
