# Supplementary material
Source: Research Square preprint supplement (doi:10.21203/rs.3.rs-8985427/v1)
Supplement: Supplementary file 3 [file d5ec95c8aea624e757b8b4b6.xlsx]

## Sheet: Model Performance
Model Performance Table (Sorted by Validation AUC)
Model	Training AUC	Training AUC 95% CI	Training Accuracy	Training Accuracy 95% CI	Training Precision	Training Recall	Training F1 Score
XGBoost	0.754	0.706-0.802	0.707	0.664-0.749	0.679	0.368	0.477
ElasticNet	0.696	0.649-0.747	0.674	0.627-0.716	0.633	0.245	0.353
Random Forest	0.742	0.695-0.787	0.650	0.606-0.695	0.513	0.768	0.615
Logistic Regression	0.700	0.651-0.749	0.636	0.589-0.676	0.500	0.613	0.551
SVM	0.717	0.666-0.764	0.641	0.660-0.746	0.505	0.652	0.569
Decision Tree	0.681	0.636-0.725	0.655	0.610-0.700	0.618	0.135	0.222
KNN	0.791	0.750-0.833	0.730	0.685-0.772	0.645	0.574	0.608
Model	Validation AUC	Validation AUC 95% CI	Validation Accuracy	Validation Accuracy 95% CI	Validation Precision	Validation Recall	Validation F1 Score
XGBoost	0.730	0.653-0.805	0.749	0.689-0.814	0.812	0.394	0.531
ElasticNet	0.713	0.631-0.791	0.716	0.656-0.787	0.769	0.303	0.435
Random Forest	0.693	0.612-0.766	0.579	0.508-0.650	0.442	0.636	0.522
Logistic Regression	0.686	0.599-0.766	0.634	0.563-0.700	0.494	0.606	0.544
SVM	0.684	0.599-0.767	0.601	0.656-0.776	0.458	0.576	0.510
Decision Tree	0.652	0.573-0.727	0.678	0.607-0.743	0.889	0.121	0.213
KNN	0.651	0.565-0.732	0.623	0.557-0.699	0.474	0.409	0.439
